# Supplementary material
Source: HighWire-hosted journal article supplement (https://thorax.bmj.com/content/thoraxjnl-2018-212456)

## Supplemental Figures and Tables

### Appendix 1. Lung cancer morphology groups

**Table 1. Lung cancer morphology groups and associated ICD10-O2 morphology codes, along with incidence counts observed for all primary lung cancers in 2000 to 2014. Counts between 0 and 5 have been suppressed.**

| <b>Broad group</b> | <b>Specific group</b>   | <b>ICD10 O2 morphology code</b> | <b>Description</b>                                    | <b>Count</b> |
|--------------------|-------------------------|---------------------------------|-------------------------------------------------------|--------------|
| SCLC               | Small cell carcinoma    | 8041                            | Small cell carcinoma NOS                              | 54,388       |
| SCLC               | Small cell carcinoma    | 8042                            | Oat cell carcinoma                                    | 3,069        |
| SCLC               | Small cell carcinoma    | 8045                            | Small cell-large cell carcinoma                       | 453          |
| SCLC               | Small cell carcinoma    | 8044                            | Small cell carcinoma, intermediate cell               | 48           |
| SCLC               | Small cell carcinoma    | 8043                            | Small cell carcinoma, fusiform cell                   | 35           |
| SCLC               | Small cell carcinoma    | 8002                            | Malignant tumour, small cell type                     | 11           |
| NSCLC              | Adenocarcinoma          | 8140                            | Adenocarcinoma NOS                                    | 95,311       |
| NSCLC              | Adenocarcinoma          | 8250                            | Bronchiolo-alveolar adenocarcinoma                    | 2,896        |
| NSCLC              | Adenocarcinoma          | 8480                            | Mucinous adenocarcinoma                               | 1,540        |
| NSCLC              | Adenocarcinoma          | 8481                            | Mucin-producing adenocarcinoma                        | 872          |
| NSCLC              | Adenocarcinoma          | 8260                            | Papillary adenocarcinoma NOS                          | 768          |
| NSCLC              | Adenocarcinoma          | 8550                            | Acinar cell carcinoma                                 | 664          |
| NSCLC              | Adenocarcinoma          | 8251                            | Alveolar adenocarcinoma                               | 254          |
| NSCLC              | Adenocarcinoma          | 8310                            | Clear cell adenocarcinoma NOS                         | 200          |
| NSCLC              | Adenocarcinoma          | 8490                            | Signet ring cell carcinoma                            | 114          |
| NSCLC              | Adenocarcinoma          | 8323                            | Mixed cell adenocarcinoma                             | 72           |
| NSCLC              | Adenocarcinoma          | 8570                            | Adenocarcinoma with squamous metaplasia               | 27           |
| NSCLC              | Adenocarcinoma          | 8211                            | Tubular adenocarcinoma                                | 22           |
| NSCLC              | Adenocarcinoma          | 8141                            | Scirrhus adenocarcinoma                               | 6            |
| NSCLC              | Adenocarcinoma          | 8440                            | Cystadenocarcinoma NOS                                | 6            |
| NSCLC              | Adenocarcinoma          | 8143                            | Superficial spreading adenocarcinoma                  | <6           |
| NSCLC              | Adenocarcinoma          | 8144                            | Adenocarcinoma, intestinal type                       | <6           |
| NSCLC              | Adenocarcinoma          | 8147                            | Basal cell adenocarcinoma                             | <6           |
| NSCLC              | Adenocarcinoma          | 8190                            | Trabecular adenocarcinoma                             | <6           |
| NSCLC              | Adenocarcinoma          | 8201                            | Cribiform carcinoma                                   | <6           |
| NSCLC              | Adenocarcinoma          | 8252                            | Bronchioalveolar carcinoma non mucinous               | <6           |
| NSCLC              | Adenocarcinoma          | 8320                            | Granular cell carcinoma                               | <6           |
| NSCLC              | Adenocarcinoma          | 8401                            | Apocrine adenocarcinoma                               | <6           |
| NSCLC              | Adenocarcinoma          | 8470                            | Mucinous cystadenocarcinoma NOS                       | <6           |
| NSCLC              | Adenocarcinoma          | 8572                            | Adenocarcinoma with spindle cell metaplasia           | <6           |
| NSCLC              | Adenocarcinoma          | 8574                            | Adenocarcinoma with neuroendocrine differentiation    | <6           |
| NSCLC              | Squamous cell carcinoma | 8070                            | Squamous cell carcinoma NOS                           | 93,142       |
| NSCLC              | Squamous cell carcinoma | 8071                            | Squamous cell carcinoma, keratinising NOS             | 5,946        |
| NSCLC              | Squamous cell carcinoma | 8072                            | Squamous cell carcinoma, large cell, non-keratinising | 1,102        |
| NSCLC              | Squamous cell carcinoma | 8073                            | Squamous cell carcinoma, small cell, non-keratinising | 91           |
| NSCLC              | Squamous cell carcinoma | 8074                            | Squamous cell carcinoma, spindle cell                 | 80           |
| NSCLC              | Squamous cell carcinoma | 8052                            | Papillary squamous cell carcinoma                     | 27           |
| NSCLC              | Squamous cell carcinoma | 8083                            | Basaloid Squamous Cell carcinoma                      | 25           |
| NSCLC              | Squamous cell carcinoma | 8076                            | Squamous cell carcinoma, microinvasive                | 6            |
| NSCLC              | Carcinoid               | 8240                            | Carcinoid tumour NOS                                  | 3,451        |
| NSCLC              | Carcinoid               | 8249                            | Atypical carcinoid tumour                             | 23           |
| NSCLC              | Carcinoid               | 8241                            | Carcinoid tumour, argentaffin, malignant              | 18           |
| NSCLC              | Carcinoid               | 8244                            | Composite carcinoid                                   | 17           |
| NSCLC              | Carcinoid               | 8243                            | Goblet cell carcinoid                                 | <6           |
| NSCLC              | Carcinoid               | 8245                            | Adenocarcinoid tumour                                 | <6           |
| NSCLC              | Other NSCLC             | 8046                            | Non-small cell carcinoma, NOS                         | 62,241       |
| NSCLC              | Other NSCLC             | 8012                            | Large cell carcinoma NOS                              | 7,225        |
| NSCLC              | Other NSCLC             | 8246                            | Neuroendocrine carcinoma                              | 3,736        |
| NSCLC              | Other NSCLC             | 8560                            | Adenosquamous carcinoma                               | 2,036        |
| NSCLC              | Other NSCLC             | 8032                            | Spindle cell carcinoma                                | 390          |
| NSCLC              | Other NSCLC             | 8022                            | Pleomorphic carcinoma                                 | 354          |
| NSCLC              | Other NSCLC             | 8033                            | Pseudosarcomatous carcinoma                           | 272          |
| NSCLC              | Other NSCLC             | 8200                            | Adenoid cystic carcinoma                              | 212          |
| NSCLC              | Other NSCLC             | 8980                            | Carcinosarcoma NOS                                    | 210          |
| NSCLC              | Other NSCLC             | 8430                            | Mucoepidermoid carcinoma                              | 98           |

|         |                    |      |                                              |         |
|---------|--------------------|------|----------------------------------------------|---------|
| NSCLC   | Other NSCLC        | 8031 | Giant cell carcinoma                         | 93      |
| NSCLC   | Other NSCLC        | 8050 | Papillary carcinoma NOS                      | 47      |
| NSCLC   | Other NSCLC        | 8972 | Pulmonary blastoma                           | 31      |
| NSCLC   | Other NSCLC        | 8013 | Large cell neuroendocrine                    | 19      |
| NSCLC   | Other NSCLC        | 8123 | Basaloid carcinoma                           | 15      |
| NSCLC   | Other NSCLC        | 8940 | Mixed tumour, malignant NOS                  | 13      |
| NSCLC   | Other NSCLC        | 8075 | Adenoid squamous cell carcinoma              | 10      |
| NSCLC   | Other NSCLC        | 8230 | Solid carcinoma NOS                          | 6       |
| NSCLC   | Other NSCLC        | 8255 | Adenocarcinoma with mixed cell types         | 6       |
| NSCLC   | Other NSCLC        | 8030 | Giant cell and spindle cell carcinoma        | <6      |
| NSCLC   | Other NSCLC        | 8034 | Polygonal cell carcinoma                     | <6      |
| NSCLC   | Other NSCLC        | 8082 | Lymphoepithelial carcinoma                   | <6      |
| NSCLC   | Other NSCLC        | 8145 | Carcinoma, diffuse type                      | <6      |
| NSCLC   | Other NSCLC        | 8562 | Epithelial-myoepithelial carcinoma           | <6      |
| NSCLC   | Unspecified lung   | 8010 | Carcinoma NOS                                | 109,420 |
| NSCLC   | Unspecified lung   | 8000 | Neoplasm, malignant                          | 48,258  |
| NSCLC   | Unspecified lung   | 8020 | Carcinoma, undifferentiated NOS              | 879     |
| NSCLC   | Unspecified lung   | 8021 | Carcinoma, anaplastic type NOS               | 301     |
| NSCLC   | Unspecified lung   | 8001 | Tumour cells, malignant                      | 250     |
| NSCLC   | Unspecified lung   | 8004 | Malignant tumour, fusiform cell type         | 32      |
| NSCLC   | Unspecified lung   | 8003 | Malignant tumour, giant cell type            | 10      |
| Exclude | Excluded - sarcoma | 8800 | Sarcoma NOS                                  | 191     |
| Exclude | Excluded - sarcoma | 8801 | Spindle cell sarcoma                         | 69      |
| Exclude | Excluded - sarcoma | 8890 | Leiomyosarcoma NOS                           | 68      |
| Exclude | Excluded - sarcoma | 8810 | Fibrosarcoma NOS                             | 48      |
| Exclude | Excluded - sarcoma | 9120 | Haemangiosarcoma                             | 28      |
| Exclude | Excluded - sarcoma | 9040 | Synovial sarcoma NOS                         | 26      |
| Exclude | Excluded - sarcoma | 8803 | Small cell sarcoma                           | 19      |
| Exclude | Excluded - sarcoma | 8900 | Rhabdomyosarcoma NOS                         | 13      |
| Exclude | Excluded - sarcoma | 8802 | Giant cell sarcoma (except of bone M9250/3)  | 10      |
| Exclude | Excluded - sarcoma | 8830 | Fibrous histiocytoma, malignant              | 8       |
| Exclude | Excluded - sarcoma | 8804 | Epithelioid sarcoma                          | <6      |
| Exclude | Excluded - sarcoma | 8811 | Fibromyxosarcoma                             | <6      |
| Exclude | Excluded - sarcoma | 8850 | Liposarcoma NOS                              | <6      |
| Exclude | Excluded - sarcoma | 8851 | Liposarcoma, well differentiated             | <6      |
| Exclude | Excluded - sarcoma | 8852 | Myxoid liposarcoma                           | <6      |
| Exclude | Excluded - sarcoma | 8854 | Pleomorphic liposarcoma                      | <6      |
| Exclude | Excluded - sarcoma | 8894 | Angiomyosarcoma                              | <6      |
| Exclude | Excluded - sarcoma | 8901 | Pleomorphic rhabdomyosarcoma                 | <6      |
| Exclude | Excluded - sarcoma | 8910 | Embryonal rhabdomyosarcoma                   | <6      |
| Exclude | Excluded - sarcoma | 8920 | Alveolar rhabdomyosarcoma                    | <6      |
| Exclude | Excluded - sarcoma | 8933 | Adenosarcoma                                 | <6      |
| Exclude | Excluded - sarcoma | 8963 | Rhabdoid sarcoma                             | <6      |
| Exclude | Excluded - sarcoma | 9170 | Lymphangiosarcoma                            | <6      |
| Exclude | Excluded - sarcoma | 9180 | Osteosarcoma NOS                             | <6      |
| Exclude | Excluded - sarcoma | 9220 | Chondrosarcoma NOS                           | <6      |
| Exclude | Excluded - sarcoma | 9260 | Ewing's sarcoma                              | <6      |
| Exclude | Excluded - unusual | 9133 | Epithelioid haemangioendothelioma, malignant | 17      |
| Exclude | Excluded - unusual | 8720 | Malignant melanoma NOS                       | 15      |
| Exclude | Excluded - unusual | 8040 | Tumourlet (uncertain malignancy)             | 11      |
| Exclude | Excluded - unusual | 8011 | Epithelioma, malignant                       | 8       |
| Exclude | Excluded - unusual | 8146 | Monomorphic adenoma                          | 8       |
| Exclude | Excluded - benign  | 8333 | Microfollicular adenoma                      | 6       |
| Exclude | Excluded - unusual | 9364 | Peripheral neuroectodermal tumour            | 6       |
| Exclude | Excluded - unusual | 8120 | Transitional cell carcinoma NOS              | <6      |
| Exclude | Excluded - unusual | 8263 | Adenocarcinoma in tubulovillous adenoma      | <6      |
| Exclude | Excluded - unusual | 8520 | Lobular carcinoma NOS                        | <6      |
| Exclude | Excluded - unusual | 8815 | Solitary fibrous tumour                      | <6      |
| Exclude | Excluded - unusual | 8982 | Myoepithelioma                               | <6      |
| Exclude | Excluded - unusual | 9050 | Mesothelioma, malignant                      | <6      |
| Exclude | Excluded - unusual | 9071 | Endodermal sinus tumour                      | <6      |
| Exclude | Excluded - unusual | 9080 | Teratoma, malignant NOS                      | <6      |
| Exclude | Excluded - unusual | 9130 | Haemangioendothelioma, malignant             | <6      |
| Exclude | Excluded - unusual | 9473 | Primitive neuroectodermal tumour             | <6      |

\* Descriptions sourced from <http://www.celsius.lshhtm.ac.uk/dataDict/appendices/MorphologyofNeoplasmsICDO2.html> and <http://codes.iarc.fr/codegroup/2>

Appendix 2 Figure 1. Flow chart showing exclusions and processing to produce the final analysis cohort of patients with first primary lung cancer

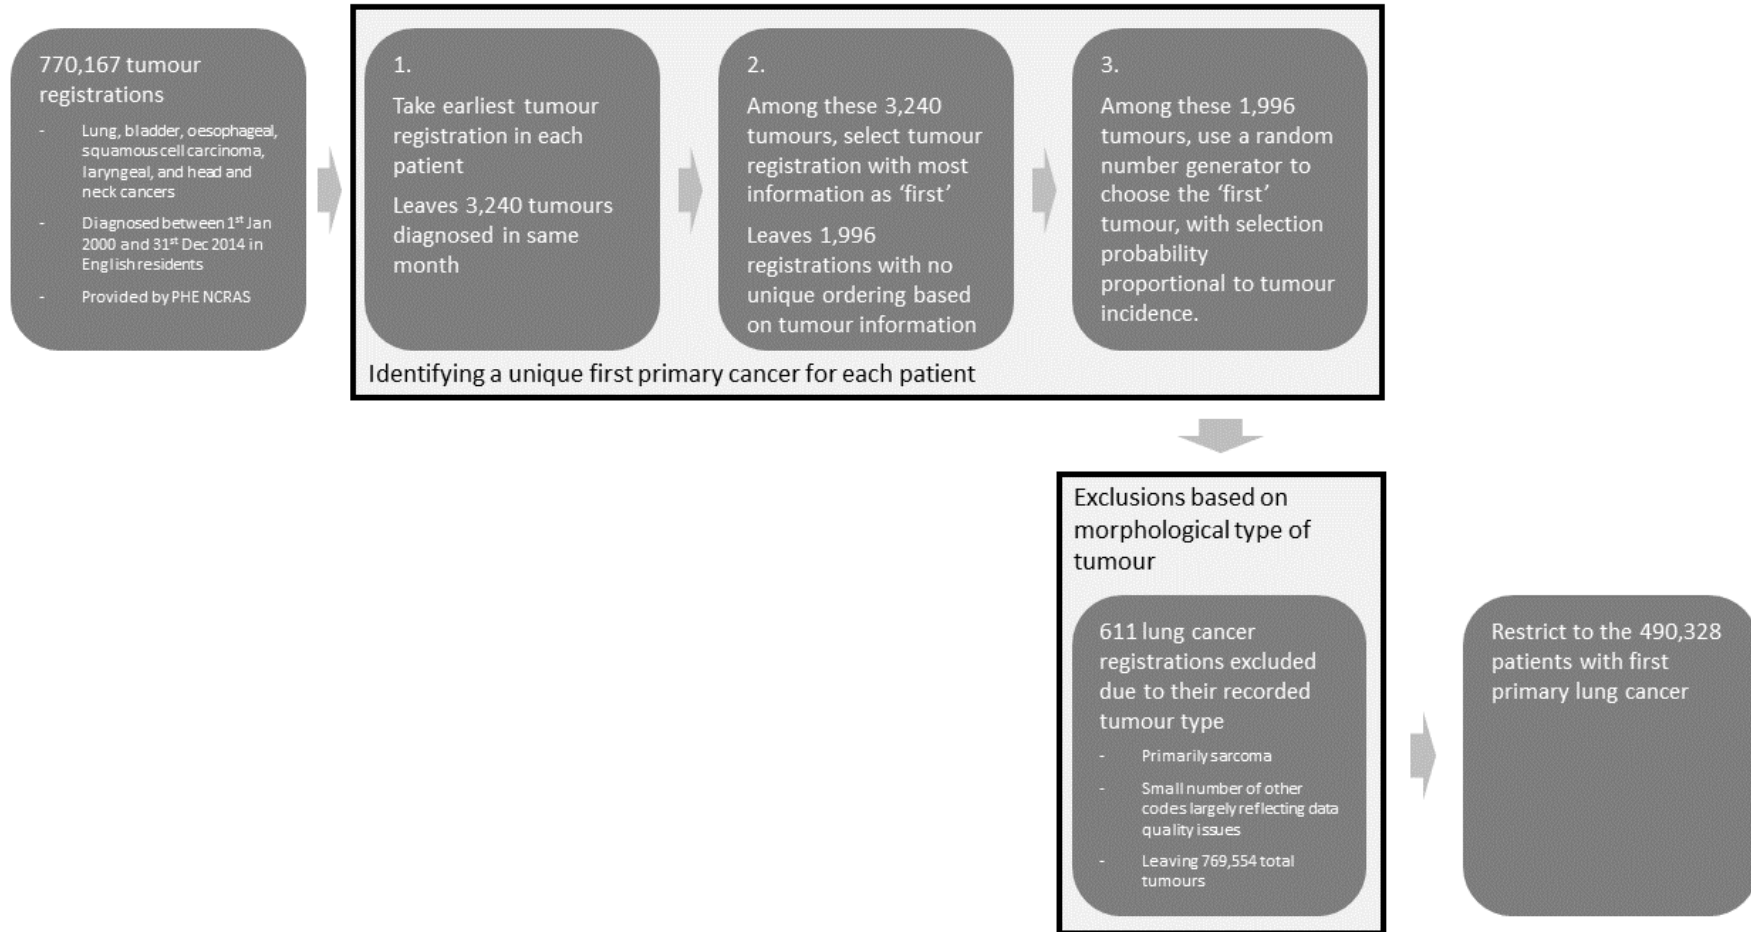

**Appendix 2 Figure 2. Flow chart showing additional processing to calculate expected incidence of smoking-related second and higher order primary cancers in patients with first primary lung cancer**

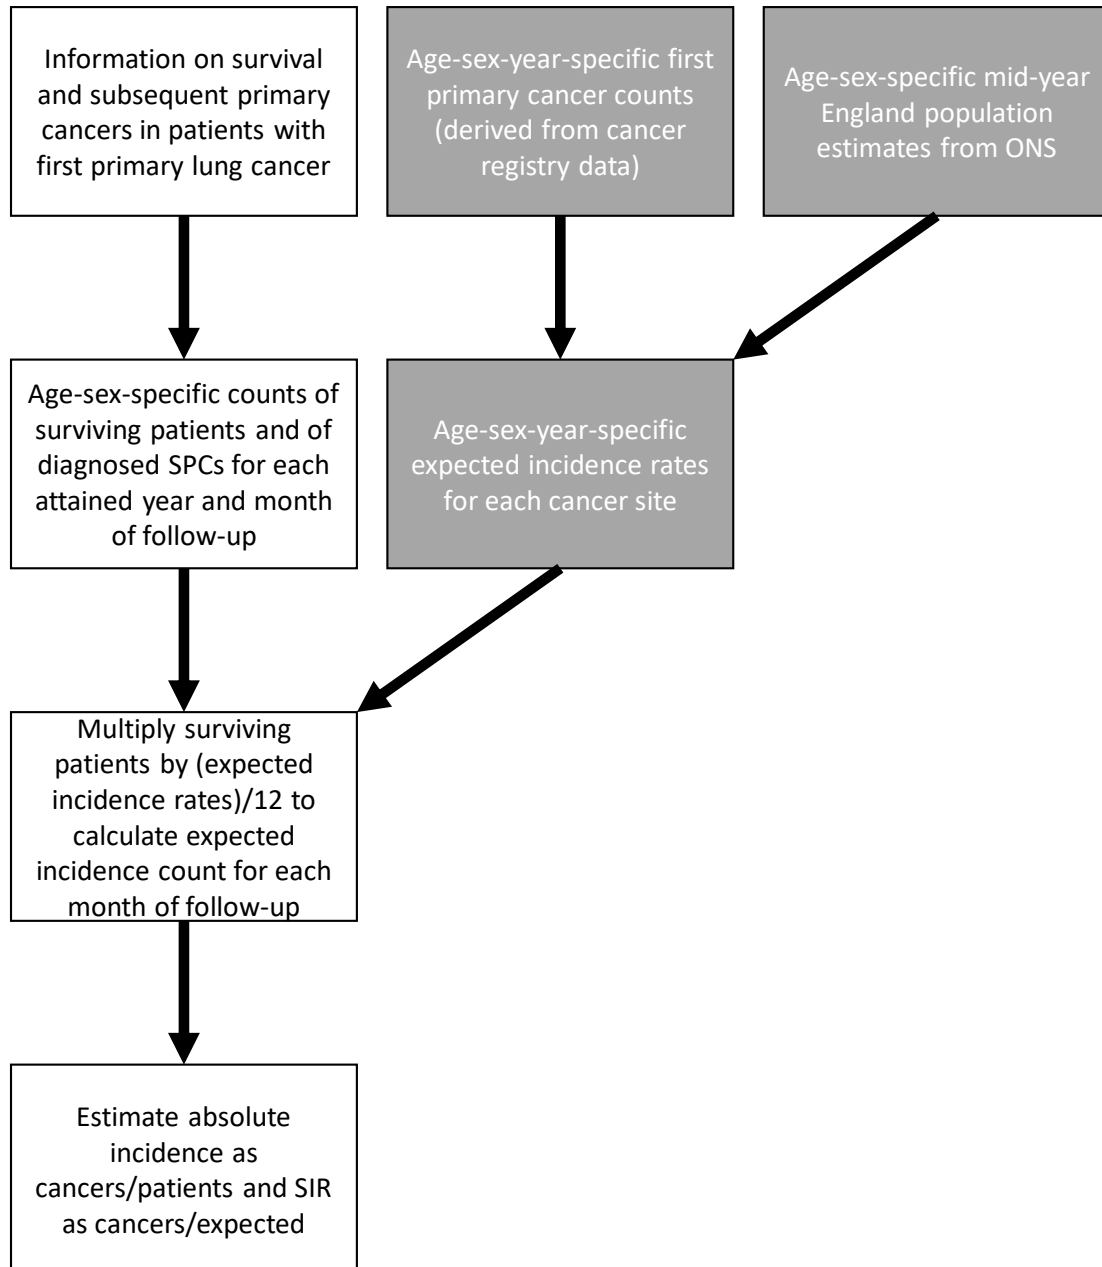

### Appendix 3. Sensitivity analysis for parametrisation of elapsed follow-up time

Appendix 3 Figure 1. Demonstration that number of knots has minimal impact on results, as long as the impact of follow-up time is not treated as linear

Overall absolute incidence rate modelled with different knot locations

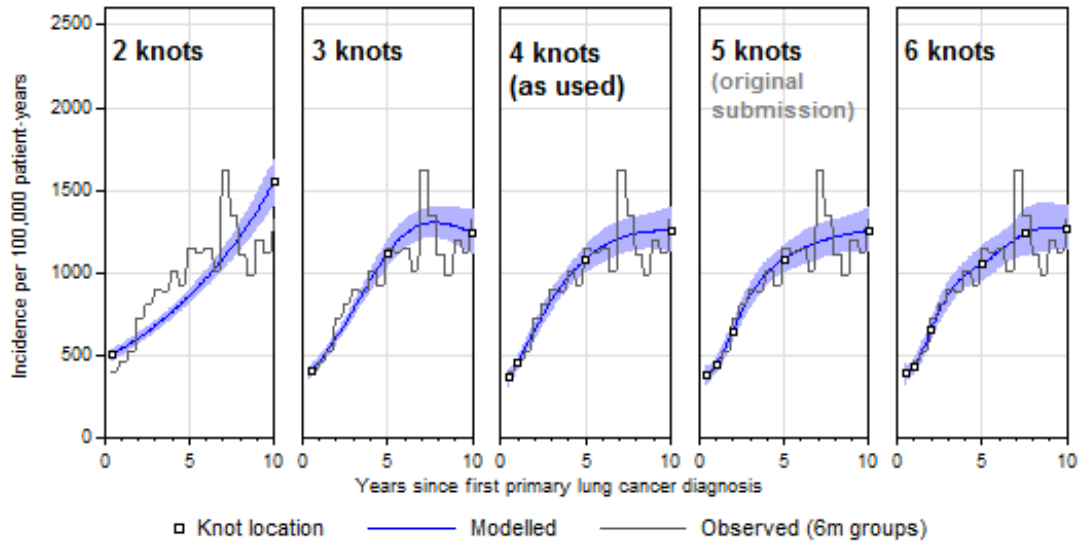

Appendix 3 Table 1. AIC and SBC for models with follow-up time as the only covariate

| Knot locations (months) | SIR model |     | Absolute incidence model |     |
|-------------------------|-----------|-----|--------------------------|-----|
|                         | AIC       | SBC | AIC                      | SBC |
| 6, 120                  | 969       | 975 | 928                      | 934 |
| 6, 60, 120              | 841       | 951 | 835                      | 844 |
| 6, 12, 60, 120          | 827       | 839 | 828.58                   | 841 |
| 6, 12, 24, 60, 120      | 825       | 841 | 828.57                   | 844 |
| 6, 12, 24, 60, 90, 120  | 826       | 845 | 830                      | 849 |

Appendix 3 Table 2. AIC and SBC for models including age and sex

| Knot locations (months) | SIR model |      | Absolute incidence model |      |
|-------------------------|-----------|------|--------------------------|------|
|                         | AIC       | SBC  | AIC                      | SBC  |
| 6, 120                  | 3793      | 3880 | 3767                     | 3854 |
| 6, 60, 120              | 3692      | 3812 | 3678                     | 3798 |
| 6, 12, 60, 120          | 3678      | 3830 | 3676                     | 3829 |
| 6, 12, 24, 60, 120      | 3683      | 3868 | 3683                     | 3869 |
| 6, 12, 24, 60, 90, 120  | 3686      | 3904 | 3687                     | 3906 |

Appendix 3 Table 3. AIC and SBC for models split by first primary cancer

| Knot locations (months) | SIR model |      | Absolute incidence model |      |
|-------------------------|-----------|------|--------------------------|------|
|                         | AIC       | SBC  | AIC                      | SBC  |
| 6, 120                  | 1316      | 1331 | 1272                     | 1288 |
| 6, 60, 120              | 1191      | 1215 | 1185                     | 1208 |
| 6, 12, 60, 120          | 1179      | 1210 | 1181.4                   | 1211 |
| 6, 12, 24, 60, 120      | 1179      | 1217 | 1182                     | 1221 |
| 6, 12, 24, 60, 90, 120  | 1178      | 1224 | 1181.5                   | 1228 |

**Appendix 3 Table 4. AIC and SBC for models with follow-up time as the only covariate, “default” knot locations**

| Number of knots at “default” locations | SIR model |     | Absolute incidence model |     |
|----------------------------------------|-----------|-----|--------------------------|-----|
|                                        | AIC       | SBC | AIC                      | SBC |
| 2                                      | 969       | 975 | 928                      | 934 |
| 3                                      | 862       | 872 | 849                      | 858 |
| 4                                      | 837       | 850 | 833                      | 846 |
| 5                                      | 831       | 846 | 832                      | 848 |
| 10                                     | 834       | 872 | 836                      | 874 |
| 15                                     | 840       | 893 | 841                      | 895 |

## Appendix 4. Additional results

**Appendix 4 Figure 1. Kaplan-Meier estimate of overall survival from lung diagnosis to ten years follow-up, by sex and age group.** Joint log-rank tests of equality of age-specific survival functions stratified by sex and of equality of sex-specific survival functions stratified by age all give  $p < 0.001$ .

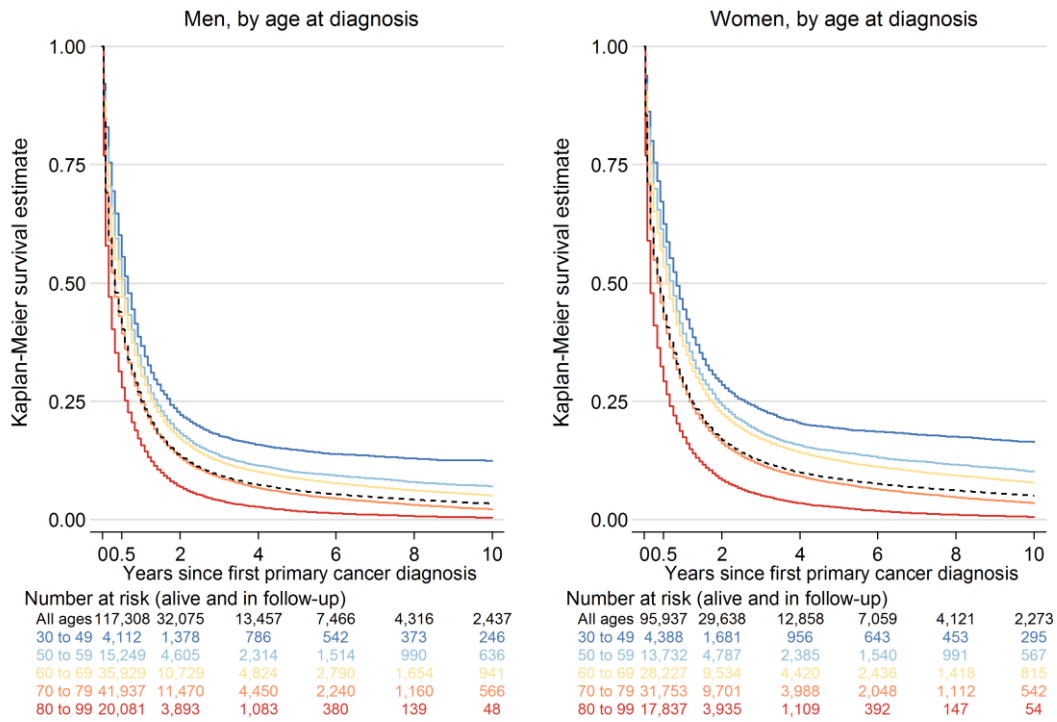

**Appendix 4 Table 1. 'Spotlight' milestone (1-, 3-, 5-, 7- and 10-year) estimates of absolute incidence rates per 100,000 and standardised incidence rate ratios for second and higher order primary cancers following lung diagnosis, by sex and age at diagnosis**

| Sex      | Age at diagnosis | Year of follow-up | Absolute incidence rate per 100,000 patient-years |                  | Standardised incidence rate ratio |            |
|----------|------------------|-------------------|---------------------------------------------------|------------------|-----------------------------------|------------|
|          |                  |                   |                                                   | (95% CI)         |                                   | (95% CI)   |
| Men      | 30 to 49         | 1                 | 385.6                                             | (252.4, 589.2)   | 3.2                               | (2.1, 4.8) |
|          |                  | 3                 | 337.4                                             | (202.8, 561.5)   | 2.8                               | (1.7, 4.7) |
|          |                  | 5                 | 349.7                                             | (210.9, 580.0)   | 3.2                               | (1.9, 5.2) |
|          |                  | 7                 | 369.5                                             | (209.8, 651.0)   | 3.0                               | (1.7, 5.4) |
|          |                  | 10                | 396.9                                             | (219.4, 718.2)   | 2.3                               | (1.3, 4.1) |
|          | 50 to 59         | 1                 | 373.3                                             | (297.8, 467.9)   | 1.5                               | (1.2, 1.8) |
|          |                  | 3                 | 718.0                                             | (577.7, 892.4)   | 2.8                               | (2.3, 3.5) |
|          |                  | 5                 | 895.1                                             | (731.4, 1095.5)  | 2.9                               | (2.4, 3.5) |
|          |                  | 7                 | 969.3                                             | (773.0, 1215.3)  | 2.6                               | (2.1, 3.3) |
|          |                  | 10                | 998.7                                             | (769.9, 1295.6)  | 2.2                               | (1.7, 2.9) |
|          | 60 to 69         | 1                 | 530.3                                             | (463.7, 606.5)   | 1.1                               | (1.0, 1.3) |
|          |                  | 3                 | 1093.9                                            | (961.7, 1244.3)  | 2.4                               | (2.1, 2.7) |
|          |                  | 5                 | 1423.6                                            | (1254.4, 1615.7) | 2.7                               | (2.4, 3.1) |
|          |                  | 7                 | 1555.2                                            | (1345.6, 1797.5) | 2.6                               | (2.3, 3.0) |
|          |                  | 10                | 1562.1                                            | (1293.9, 1885.9) | 2.4                               | (2.0, 2.9) |
|          | 70 to 79         | 1                 | 597.1                                             | (528.8, 674.3)   | 0.8                               | (0.7, 0.9) |
|          |                  | 3                 | 1152.7                                            | (1017.1, 1306.4) | 1.5                               | (1.3, 1.7) |
|          |                  | 5                 | 1435.4                                            | (1249.7, 1648.8) | 1.8                               | (1.6, 2.1) |
|          |                  | 7                 | 1553.6                                            | (1323.8, 1823.2) | 1.9                               | (1.6, 2.2) |
|          |                  | 10                | 1602.6                                            | (1269.1, 2023.7) | 1.9                               | (1.5, 2.3) |
| 80 to 99 | 1                | 591.0             | (489.7, 713.3)                                    | 0.7              | (0.5, 0.8)                        |            |
|          | 3                | 925.1             | (728.1, 1175.5)                                   | 1.0              | (0.8, 1.3)                        |            |
|          | 5                | 1381.8            | (993.3, 1922.1)                                   | 1.5              | (1.1, 2.1)                        |            |
| Women    | 30 to 49         | 1                 | 266.4                                             | (168.4, 421.5)   | 3.7                               | (2.3, 5.8) |
|          |                  | 3                 | 223.2                                             | (130.7, 381.2)   | 3.1                               | (1.8, 5.3) |
|          |                  | 5                 | 249.1                                             | (147.5, 420.6)   | 3.7                               | (2.2, 6.3) |
|          |                  | 7                 | 288.2                                             | (162.2, 512.3)   | 3.9                               | (2.2, 7.0) |
|          |                  | 10                | 353.6                                             | (196.4, 636.6)   | 3.4                               | (1.9, 6.0) |
|          | 50 to 59         | 1                 | 355.7                                             | (282.4, 448.2)   | 2.4                               | (1.9, 3.1) |
|          |                  | 3                 | 655.1                                             | (525.6, 816.4)   | 4.4                               | (3.5, 5.5) |
|          |                  | 5                 | 879.3                                             | (719.7, 1074.4)  | 4.9                               | (4.0, 6.0) |
|          |                  | 7                 | 1042.8                                            | (835.0, 1302.3)  | 4.9                               | (3.9, 6.1) |
|          |                  | 10                | 1227.3                                            | (960.8, 1567.7)  | 4.7                               | (3.7, 6.0) |
|          | 60 to 69         | 1                 | 388.8                                             | (331.4, 456.2)   | 1.5                               | (1.3, 1.8) |
|          |                  | 3                 | 767.7                                             | (659.5, 893.6)   | 3.0                               | (2.6, 3.5) |
|          |                  | 5                 | 1075.8                                            | (929.9, 1244.6)  | 3.7                               | (3.2, 4.3) |
|          |                  | 7                 | 1287.1                                            | (1092.4, 1516.5) | 4.0                               | (3.4, 4.7) |
|          |                  | 10                | 1476.6                                            | (1208.3, 1804.5) | 4.1                               | (3.3, 5.0) |
|          | 70 to 79         | 1                 | 394.6                                             | (338.0, 460.8)   | 1.0                               | (0.9, 1.2) |
|          |                  | 3                 | 729.3                                             | (623.7, 852.8)   | 1.9                               | (1.6, 2.2) |
|          |                  | 5                 | 977.9                                             | (831.8, 1149.6)  | 2.4                               | (2.1, 2.9) |
|          |                  | 7                 | 1159.2                                            | (965.9, 1391.1)  | 2.8                               | (2.3, 3.3) |
|          |                  | 10                | 1365.7                                            | (1072.1, 1739.8) | 3.2                               | (2.5, 4.0) |
| 80 to 99 | 1                | 322.9             | (252.5, 412.9)                                    | 0.8              | (0.7, 1.1)                        |            |
|          | 3                | 483.8             | (362.0, 646.7)                                    | 1.2              | (0.9, 1.6)                        |            |
|          | 5                | 778.2             | (540.0, 1121.3)                                   | 2.0              | (1.4, 2.8)                        |            |



**Appendix 4 Figure 2. Incidence rate per 100,000 patient-years of second and higher order smoking-related primary cancers after lung cancer diagnosis up to ten years follow-up, by site of second primary cancer**

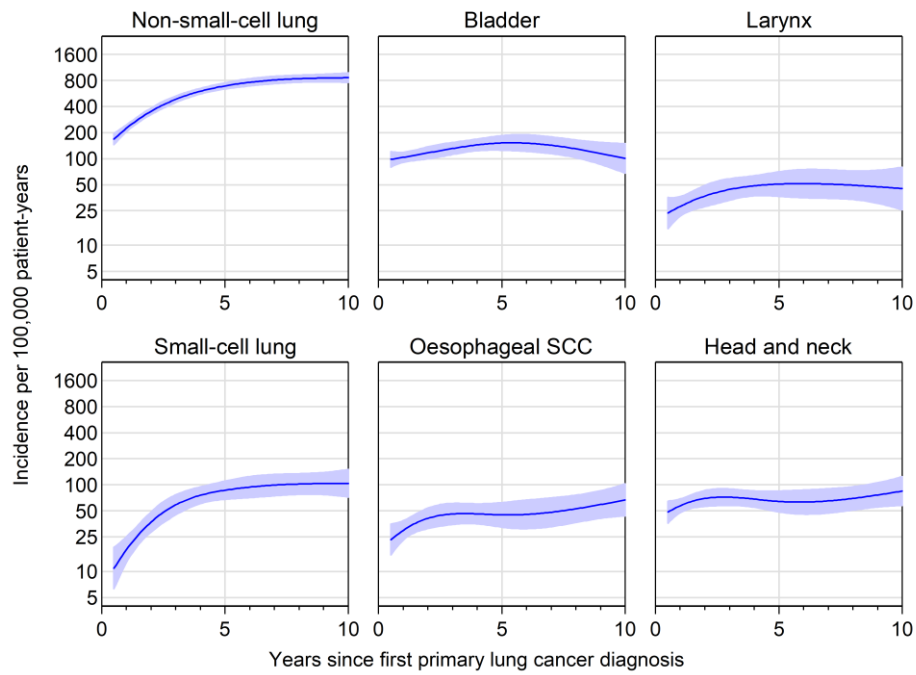

**Appendix 4 Figure 3. Incidence rate per 100,000 patient-years of second and higher order smoking-related primary cancers after lung cancer diagnosis up to ten years follow-up, by sub-site of first primary lung cancer**

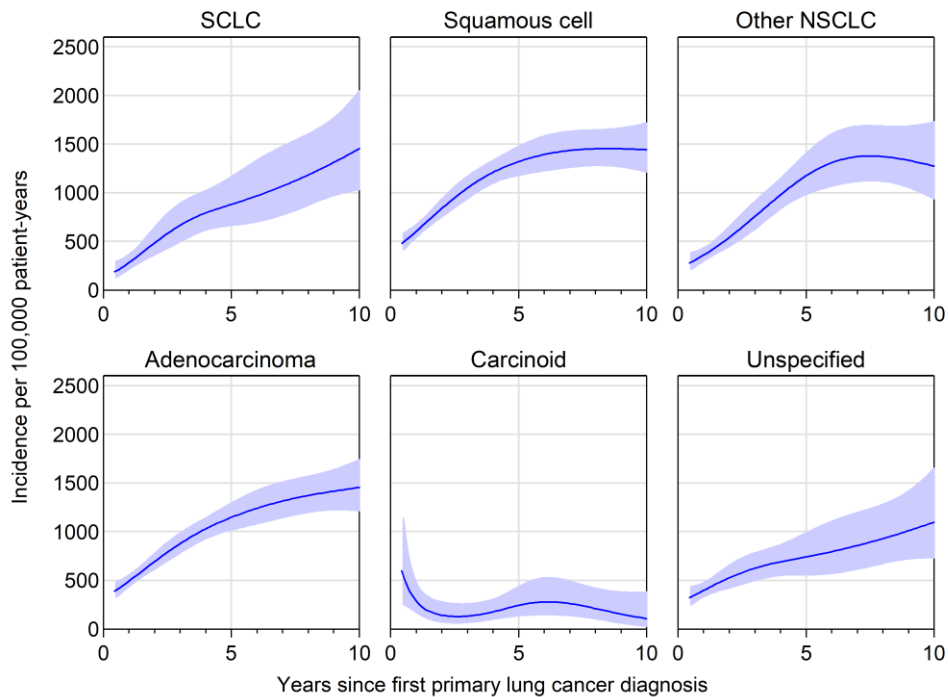

**Appendix 4 Figure 4. Standardised incidence rate ratio for second and higher order smoking-related primary cancers after lung cancer diagnosis up to ten years follow-up, by sub-site of first primary lung cancer**

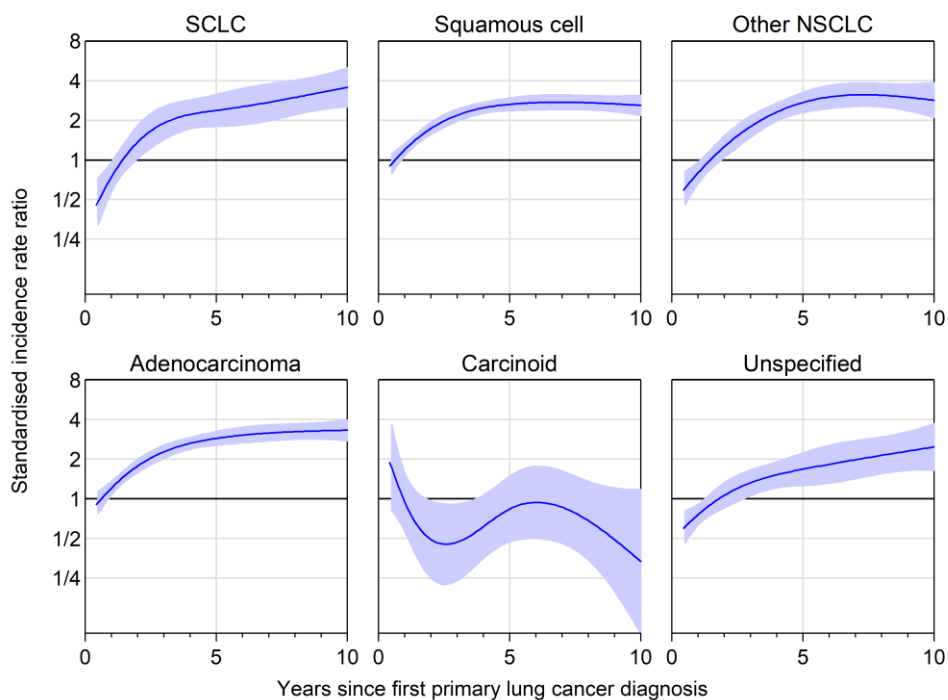

Supplement: inline-supplementary-material-1 [file inline-supplementary-material-1.pdf]
